# Supplementary material
Source: Springer Nature journal article supplement (https://www.springermedizin.de/resource/supplementary/13075_2004_1577_MOESM5_ESM.pdf/9690090)

□ Cit-RSA-im.

■ RSA-im.

\*

—

6.0

5.0

4.0

3.0

2.0

1.0

0.0

S.I.

RSA-stim

Cit-RSA-stim

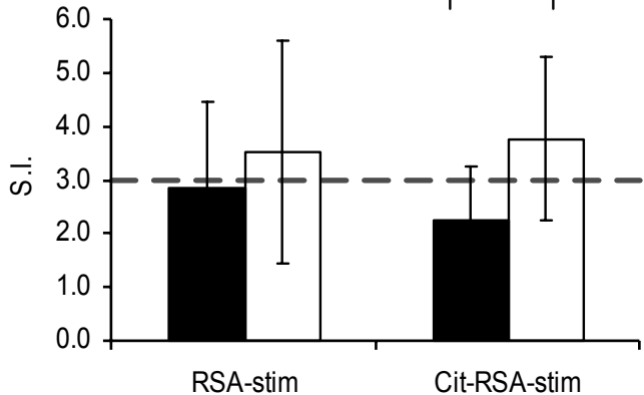

Supplement: MOESM5 [file 9690090]
